# Supplementary material for: Homogeneous Organic Crystal Nucleation Rates in Solution from the Perspective of Chemical Reaction Kinetics
Source: MDPI journal article supplement (doi:10.3390/cryst14040349), 2024-04-06

## Supplementary Information

# Homogeneous Organic Crystal Nucleation Rates in Solution from the Perspective of Chemical Reaction Kinetics

Sven L. M. Schroeder <sup>1,2,3</sup>

<sup>1</sup> School of Chemical and Process Engineering, University of Leeds, Leeds LS2 9JT, UK; s.l.m.schroeder@leeds.ac.uk

<sup>2</sup> Diamond Light Source, Harwell Science & Innovation Campus, Didcot OX11 0DE, UK

<sup>3</sup> Future Continuous Manufacturing and Advanced Crystallisation (CMAC) Hub, Research Complex at Harwell (RCaH), Harwell Science & Innovation Campus, Didcot OX11 0FA, UK

## SI1 - Size distribution of reversible aggregates – full derivation

Mass balance of the overall activity of an ideal solution and the activities of the reversible aggregates  $M_n$

$$a_0 = \sum_{n=1}^{\infty} n a_n$$

With  $K=1$  (reversible aggregation), it follows that (see main text)

$$a_n = a_1^n$$

And therefore

$$a_0 = \sum_{n=1}^{\infty} n a_1^n$$

The term on the right hand side is a standard power series with the solution

$$\sum_{n=1}^k n a_1^n = a_1 \frac{1 - (k+1)a_1^k + k a_1^{k+1}}{(1 - a_1)^2}$$

For  $k \rightarrow \infty$ ,

$$a_1^k = 0$$

$$a_1^{k+1} = 0$$

Hence

$$a_0 = \sum_{n=1}^{\infty} n a_1^n = \frac{a_1}{(1 - a_1)^2}$$

Solve for  $a_1$

$$a_0(1 - a_1)^2 = a_1$$

$$a_1^2 - \left(2 + \frac{1}{a_0}\right)a_1 + 1 = 0$$

This is a second order polynomial of the form  $jx^2 + kx + l$  with

$$j = 1; k = -\left(2 + \frac{1}{a_0}\right); l = 1$$

Solve with quadratic formula

$$a_1 = \frac{-k \pm \sqrt{k^2 - 4jl}}{2j} = \frac{\left(2 + \frac{1}{a_0}\right) \pm \sqrt{\left(2 + \frac{1}{a_0}\right)^2 - 4}}{2} = \left(1 + \frac{1}{2a_0}\right) \pm \frac{1}{2a_0} \sqrt{4a_0 + 1}$$

Only the subtraction gives a meaningful solution; now introduce  $1 + \sqrt{4a_0 + 1}$  in the denominator,

$$a_1 = \frac{\left( \left( 1 + \frac{1}{2a_0} \right) - \frac{1}{2a_0} \sqrt{4a_0 + 1} \right) (1 + \sqrt{4a_0 + 1})}{1 + \sqrt{4a_0 + 1}}$$

Algebra simplifies the numerator to

$$a_1 = \frac{\sqrt{4a_0 + 1} - 1}{\sqrt{4a_0 + 1} + 1} = \frac{m - 1}{m + 1}$$

with

$$m = \sqrt{4a_0 + 1}$$

Final expression for the aggregate size distribution, using  $a_n = a_1^n$  from above:

$$a_n = \left( \frac{\sqrt{4a_0 + 1} - 1}{\sqrt{4a_0 + 1} + 1} \right)^n = \left( \frac{m - 1}{m + 1} \right)^n$$

Since this is an ideal solution we can replace the activities by the concentrations  $[M_n]$  and  $[M]_0$  according to

$$a_0 = \frac{[M]_0}{c^\ominus}$$

With

$$c^\ominus = 1 \frac{\text{mol}}{\text{dm}^3}$$

Giving

$$[M_n] = c^\ominus \left( \frac{\sqrt{4[M]_0/c^\ominus + 1} - 1}{\sqrt{4[M]_0/c^\ominus + 1} + 1} \right)^n$$

Numerically, since  $c^\ominus = 1 \frac{\text{mol}}{\text{dm}^3}$ , the concentration  $[M_n]$  of any aggregate with n solute molecules in  $\text{mol dm}^{-3}$  is thus given by

$$[M_n] = \left( \frac{\sqrt{4[M]_0 + 1} - 1}{\sqrt{4[M]_0 + 1} + 1} \right)^n$$

## SI2 - Calculation of $n^*$

$$[M_n] = \left( \frac{m-1}{m+1} \right)^n$$

with

$$m = \sqrt{4[M]_0 + 1}$$

Condition for solubility  $[M]_0^*$ : number of aggregates with  $n^*$  must be at least 1.

$$N_{n^*} = [M_{n^*}] N_A V = 1$$

Combine the above equations with  $[M]_0 = [M]_0^*$

$$\left( \frac{\sqrt{4[M]_0^* + 1} - 1}{\sqrt{4[M]_0^* + 1} + 1} \right)^{n^*} N_A V = 1$$

Solve

$$\begin{aligned} \left( \frac{\sqrt{4[M]_0^* + 1} - 1}{\sqrt{4[M]_0^* + 1} + 1} \right)^{n^*} &= \frac{1}{N_A V} \\ n^* \ln \left( \frac{\sqrt{4[M]_0^* + 1} - 1}{\sqrt{4[M]_0^* + 1} + 1} \right) &= -\ln(N_A V) \\ n^* &= -\frac{\ln(N_A V)}{\ln \left( \frac{\sqrt{4[M]_0^* + 1} - 1}{\sqrt{4[M]_0^* + 1} + 1} \right)} \end{aligned}$$

The resulting value for  $n^*$  should be rounded down to the nearest integer.

### SI3 - Dependence of $S_{200}$ on $k^*$ and $\ln(k^*)$ as a function concentration

Calculated for a solution volume of  $1.55 \text{ cm}^3$

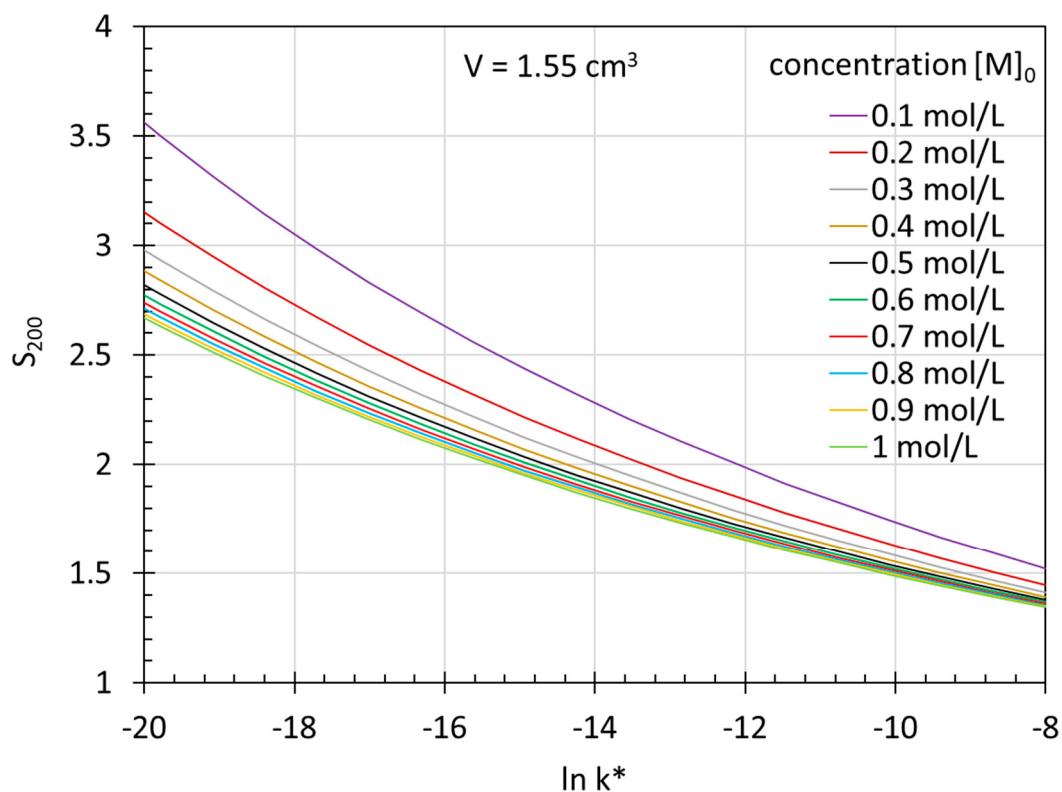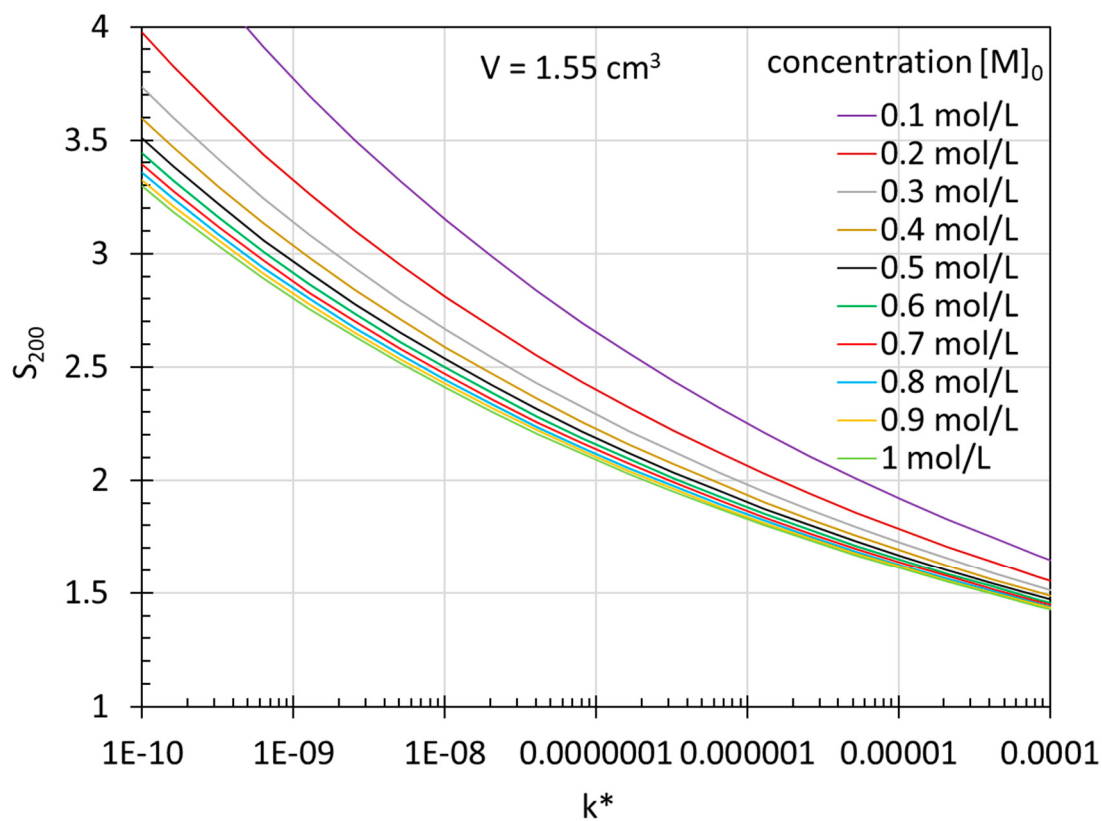

# SI4 – Fits to experimental data for the 10 benzoic acid systems as a function of supersaturation S

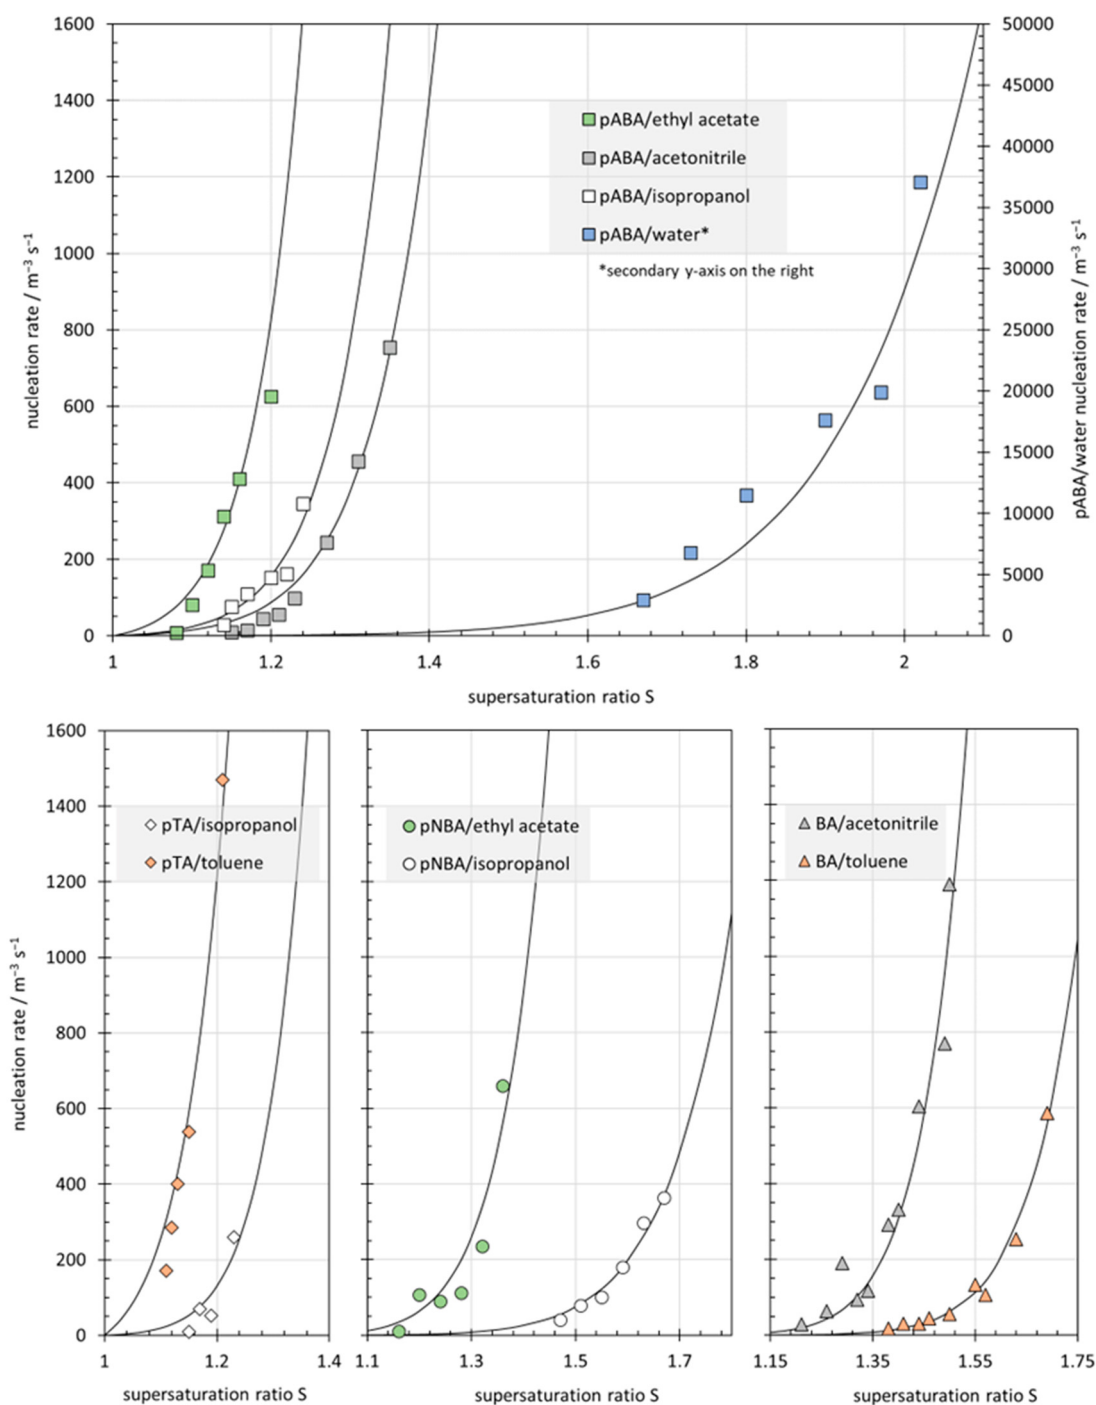

Supplement: s1 [file s1 › crystals-2692473-supplementary.pdf]
