# Supplementary material for: Homogeneous Organic Crystal Nucleation Rates in Solution from the Perspective of Chemical Reaction Kinetics
Source: MDPI journal article supplement (doi:10.3390/cryst14040349), 2024-04-06
Supplement: s1 [file s1]

Archive with 1 entries (1 files):
- crystals-2692473-supplementary.pdf
